# Supplementary material for: Long-range corrected hybrid density functionals with damped atom–atom dispersion corrections
Source: Royal Society of Chemistry journal article supplement (doi:10.1039/b810189b), 2008-01-01
Supplement: b810189b.pdf [file b810189b.pdf]

## Supplementary material to: Long-Range Corrected Hybrid Density Functionals with Damped Atom-Atom Dispersion Corrections

Jeng-Da Chai\* and Martin Head-Gordon†

*Department of Chemistry, University of California and  
Chemical Sciences Division, Lawrence Berkeley National Laboratory, Berkeley, California 94720, USA*

- 
- [1] P. Jurečka, J. Šponer, J. Černý, and P. Hobza, *Phys. Chem. Chem. Phys.* **8**, 1985 (2006).  
[2] J.-D. Chai and M. Head-Gordon, *J. Chem. Phys.* **128**, 084106 (2008).  
[3] Y. Zhao and D. G. Truhlar, *J. Phys. Chem. A* **109**, 5656 (2005).  
[4] Y. Zhao, B. J. Lynch, and D. G. Truhlar, *J. Phys. Chem. A* **108**, 2715 (2004).  
[5] Y. Zhao, N. González-García, and D. G. Truhlar, *J. Phys. Chem. A* **109**, 2012 (2005); **110**, 4942(E) (2006).

---

\* Electronic address: [jdchai@berkeley.edu](mailto:jdchai@berkeley.edu)

† Author to whom correspondence should be addressed. Electronic address: [mhg@cchem.berkeley.edu](mailto:mhg@cchem.berkeley.edu)

TABLE I: Interaction energies (in kcal/mol) for the S22 set [1]. The counterpoise corrections are used to reduce the basis set superposition errors. Monomer deformation energies are not included. The results for the  $\omega$ B97X and  $\omega$ B97 are taken from Ref. [2].

| Complex [Symmetry]                                               | $\Delta E_{ref}$ | $\omega$ B97X-D | B97-D  | B3LYP-D | BLYP-D | $\omega$ B97X | $\omega$ B97 |
|------------------------------------------------------------------|------------------|-----------------|--------|---------|--------|---------------|--------------|
| <b>Hydrogen bonded complexes</b>                                 |                  |                 |        |         |        |               |              |
| (NH <sub>3</sub> ) <sub>2</sub> [C <sub>2h</sub> ]               | -3.17            | -3.07           | -3.15  | -3.65   | -3.44  | -3.58         | -3.64        |
| (H <sub>2</sub> O) <sub>2</sub> [C <sub>s</sub> ]                | -5.02            | -4.97           | -4.32  | -5.30   | -4.92  | -5.59         | -5.64        |
| Formic acid dimer [C <sub>2h</sub> ]                             | -18.61           | -19.30          | -17.48 | -19.93  | -18.50 | -19.96        | -20.13       |
| Formamide dimer [C <sub>2h</sub> ]                               | -15.96           | -16.16          | -14.62 | -16.76  | -15.63 | -16.65        | -16.78       |
| Uracil dimer [C <sub>2h</sub> ]                                  | -20.65           | -20.44          | -18.99 | -21.38  | -20.22 | -20.30        | -20.31       |
| 2-pyridoxine·2-aminopyridine [C <sub>1</sub> ]                   | -16.71           | -17.06          | -16.46 | -17.89  | -17.28 | -16.37        | -16.40       |
| Adenine·thymine WC [C <sub>1</sub> ]                             | -16.37           | -16.45          | -15.60 | -17.27  | -16.50 | -15.91        | -16.05       |
| MSE                                                              |                  | -0.14           | 0.84   | -0.81   | 0.00   | -0.27         | -0.35        |
| MAE                                                              |                  | 0.24            | 0.84   | 0.81    | 0.28   | 0.60          | 0.63         |
| <b>Dispersion complexes</b>                                      |                  |                 |        |         |        |               |              |
| (CH <sub>4</sub> ) <sub>2</sub> [D <sub>3d</sub> ]               | -0.53            | -0.57           | -0.54  | -0.47   | -0.32  | -0.57         | -0.44        |
| (C <sub>2</sub> H <sub>4</sub> ) <sub>2</sub> [D <sub>2d</sub> ] | -1.51            | -1.78           | -1.48  | -1.73   | -1.44  | -1.77         | -1.92        |
| Benzene·CH <sub>4</sub> [C <sub>3</sub> ]                        | -1.50            | -1.68           | -1.41  | -1.47   | -1.23  | -1.41         | -1.55        |
| Benzene dimer [C <sub>2h</sub> ]                                 | -2.73            | -3.19           | -2.40  | -2.15   | -1.91  | -1.57         | -2.33        |
| Pyrazine dimer [C <sub>s</sub> ]                                 | -4.42            | -4.25           | -3.88  | -3.99   | -3.71  | -2.86         | -3.68        |
| Uracil dimer [C <sub>2</sub> ]                                   | -10.12           | -9.79           | -9.37  | -10.33  | -9.68  | -7.84         | -8.90        |
| Indole·benzene [C <sub>1</sub> ]                                 | -5.22            | -5.05           | -4.35  | -4.18   | -3.97  | -2.39         | -3.58        |
| Adenine·thymine stack [C <sub>1</sub> ]                          | -12.23           | -11.81          | -11.42 | -12.47  | -11.88 | -8.40         | -10.26       |
| MSE                                                              |                  | 0.02            | 0.43   | 0.18    | 0.52   | 1.43          | 0.70         |
| MAE                                                              |                  | 0.25            | 0.43   | 0.35    | 0.52   | 1.51          | 0.82         |
| <b>Mixed complexes</b>                                           |                  |                 |        |         |        |               |              |
| Ethene·ethine [C <sub>2v</sub> ]                                 | -1.53            | -1.64           | -1.63  | -1.69   | -1.49  | -1.67         | -1.63        |
| Benzene·H <sub>2</sub> O [C <sub>s</sub> ]                       | -3.28            | -3.50           | -3.42  | -3.67   | -3.30  | -3.39         | -3.56        |
| Benzene·NH <sub>3</sub> [C <sub>s</sub> ]                        | -2.35            | -2.54           | -2.36  | -2.48   | -2.19  | -2.31         | -2.46        |
| Benzene·HCN [C <sub>s</sub> ]                                    | -4.46            | -4.79           | -4.70  | -5.18   | -4.65  | -4.61         | -4.89        |
| Benzene dimer [C <sub>2v</sub> ]                                 | -2.74            | -2.89           | -2.75  | -2.80   | -2.51  | -2.11         | -2.38        |
| Indole·benzene T-shape [C <sub>1</sub> ]                         | -5.73            | -5.63           | -5.86  | -6.07   | -5.68  | -4.44         | -4.82        |
| Phenol dimer [C <sub>1</sub> ]                                   | -7.05            | -6.98           | -6.03  | -7.23   | -6.65  | -6.49         | -6.93        |
| MSE                                                              |                  | -0.12           | 0.06   | -0.28   | 0.10   | 0.30          | 0.07         |
| MAE                                                              |                  | 0.17            | 0.24   | 0.28    | 0.16   | 0.42          | 0.33         |
| MSE                                                              |                  | -0.08           | 0.44   | -0.28   | 0.22   | 0.53          | 0.16         |
| MAE                                                              |                  | 0.22            | 0.50   | 0.48    | 0.33   | 0.87          | 0.60         |
| rms                                                              |                  | 0.27            | 0.69   | 0.60    | 0.44   | 1.30          | 0.80         |
| Max(-)                                                           |                  | -0.69           | -0.24  | -1.32   | -0.57  | -1.35         | -1.52        |
| Max(+)                                                           |                  | 0.42            | 1.66   | 1.04    | 1.25   | 3.83          | 1.97         |

TABLE II: Binding energies (in kcal/mol) of several sets of noncovalent interactions. The first three sets are taken from Ref. [3] with monomer deformation energies taken into considerations. The last three sets are taken from Ref. [1] without considering monomer deformation energies. The counter-point corrections are applied for all the cases. The results for the  $\omega$ B97X and  $\omega$ B97 are taken from Ref. [2].

| Complex                                         | $\Delta E_{ref}$ | $\omega$ B97X-D | B97-D  | B3LYP-D | BLYP-D | $\omega$ B97X | $\omega$ B97 |
|-------------------------------------------------|------------------|-----------------|--------|---------|--------|---------------|--------------|
| <b>Charge-transfer complexes</b>                |                  |                 |        |         |        |               |              |
| C <sub>2</sub> H <sub>4</sub> ···F <sub>2</sub> | 1.06             | 0.78            | 3.02   | 2.20    | 3.53   | 1.03          | 1.09         |
| NH <sub>3</sub> ···F <sub>2</sub>               | 1.81             | 1.50            | 4.33   | 3.20    | 5.32   | 1.93          | 1.98         |
| C <sub>2</sub> H <sub>2</sub> ···ClF            | 3.81             | 3.66            | 4.57   | 4.49    | 5.18   | 4.43          | 4.50         |
| HCN···ClF                                       | 4.86             | 4.21            | 3.87   | 4.76    | 5.00   | 5.32          | 5.42         |
| NH <sub>3</sub> ···Cl <sub>2</sub>              | 4.88             | 4.81            | 6.36   | 6.06    | 7.15   | 5.18          | 4.89         |
| H <sub>2</sub> O···ClF                          | 5.36             | 5.18            | 5.31   | 5.98    | 6.43   | 6.16          | 6.21         |
| NH <sub>3</sub> ···ClF                          | 10.62            | 11.12           | 14.16  | 13.54   | 15.48  | 11.10         | 10.49        |
| MSE                                             |                  | -0.16           | 1.32   | 1.12    | 2.24   | 0.39          | 0.31         |
| MAE                                             |                  | 0.31            | 1.61   | 1.15    | 2.24   | 0.40          | 0.35         |
| <b>Dipole-dipole interaction complexes</b>      |                  |                 |        |         |        |               |              |
| H <sub>2</sub> S···H <sub>2</sub> S             | 1.66             | 1.54            | 1.59   | 1.58    | 1.50   | 1.99          | 1.99         |
| HCl···HCl                                       | 2.01             | 1.69            | 1.63   | 1.88    | 1.77   | 2.30          | 2.33         |
| H <sub>2</sub> S···HCl                          | 3.35             | 3.38            | 3.46   | 3.57    | 3.58   | 3.90          | 3.93         |
| CH <sub>3</sub> Cl···HCl                        | 3.55             | 3.17            | 3.11   | 3.52    | 3.41   | 3.82          | 3.97         |
| HCN···CH <sub>3</sub> SH                        | 3.59             | 3.72            | 3.65   | 3.95    | 3.74   | 3.99          | 4.05         |
| CH <sub>3</sub> SH···HCl                        | 4.16             | 4.87            | 5.17   | 5.29    | 5.36   | 5.28          | 5.38         |
| MSE                                             |                  | 0.01            | 0.05   | 0.25    | 0.17   | 0.50          | 0.56         |
| MAE                                             |                  | 0.28            | 0.35   | 0.33    | 0.35   | 0.50          | 0.56         |
| <b>Weak interaction complexes</b>               |                  |                 |        |         |        |               |              |
| He···Ne                                         | 0.04             | 0.00            | 0.09   | 0.04    | 0.01   | 0.01          | -0.05        |
| He···Ar                                         | 0.06             | 0.00            | 0.07   | 0.01    | -0.05  | 0.05          | -0.03        |
| Ne···Ne                                         | 0.08             | -0.02           | 0.17   | 0.14    | 0.11   | -0.02         | -0.07        |
| Ne···Ar                                         | 0.13             | -0.01           | 0.19   | 0.16    | 0.10   | 0.05          | -0.04        |
| CH <sub>4</sub> ···Ne                           | 0.22             | 0.13            | 0.30   | 0.24    | 0.17   | 0.10          | 0.00         |
| C <sub>6</sub> H <sub>6</sub> ···Ne             | 0.47             | 0.24            | 0.50   | 0.60    | 0.47   | 0.30          | 0.32         |
| CH <sub>4</sub> ···CH <sub>4</sub>              | 0.51             | 0.60            | 0.51   | 0.51    | 0.33   | 0.64          | 0.55         |
| MSE                                             |                  | -0.08           | 0.04   | 0.03    | -0.05  | -0.05         | -0.12        |
| MAE                                             |                  | 0.11            | 0.05   | 0.04    | 0.06   | 0.09          | 0.13         |
| <b>Hydrogen-bonded DNA base pairs</b>           |                  |                 |        |         |        |               |              |
| G···A HB                                        | -11.30           | -13.48          | -13.02 | -14.19  | -13.72 | -12.29        | -12.44       |
| C···G WC                                        | -30.70           | -32.45          | -30.00 | -33.36  | -31.55 | -31.92        | -32.12       |
| G···C WC                                        | -31.40           | -32.28          | -29.70 | -33.14  | -31.28 | -31.85        | -32.07       |
| MSE                                             |                  | -1.60           | 0.23   | -2.43   | -1.05  | -0.89         | -1.08        |
| MAE                                             |                  | 1.60            | 1.37   | 2.43    | 1.13   | 0.89          | 1.08         |
| <b>Interstrand base pairs</b>                   |                  |                 |        |         |        |               |              |
| G···G IS                                        | -5.20            | -5.43           | -5.35  | -5.30   | -5.08  | -4.83         | -4.70        |
| G···G IS                                        | 0.80             | 1.15            | 1.04   | 1.30    | 1.31   | 2.21          | 2.13         |
| C···C IS                                        | 3.10             | 3.29            | 2.87   | 3.26    | 3.06   | 3.62          | 3.69         |
| MSE                                             |                  | 0.10            | -0.05  | 0.18    | 0.20   | 0.77          | 0.80         |
| MAE                                             |                  | 0.25            | 0.20   | 0.25    | 0.23   | 0.77          | 0.80         |
| <b>Stacked base pairs</b>                       |                  |                 |        |         |        |               |              |
| A···G S                                         | -6.50            | -6.66           | -6.22  | -6.55   | -6.25  | -3.46         | -4.62        |
| C···G S                                         | -12.40           | -10.83          | -10.11 | -10.56  | -10.10 | -8.57         | -9.61        |
| G···C S                                         | -11.60           | -11.06          | -10.31 | -10.71  | -10.21 | -8.77         | -9.69        |
| MSE                                             |                  | 0.65            | 1.29   | 0.89    | 1.31   | 3.23          | 2.19         |
| MAE                                             |                  | 0.76            | 1.29   | 0.93    | 1.31   | 3.23          | 2.19         |
| MSE                                             |                  | -0.14           | 0.49   | 0.19    | 0.61   | 0.51          | 0.36         |
| MAE                                             |                  | 0.43            | 0.77   | 0.73    | 0.90   | 0.73          | 0.65         |
| rms                                             |                  | 0.68            | 1.19   | 1.15    | 1.51   | 1.18          | 0.93         |

TABLE III: Comparison of errors of different functionals for the reaction energies (in kcal/mol) of the 30 chemical reactions in the NHTBH38/04 and HTBH38/04 database [4, 5]. The results for the  $\omega$ B97X and  $\omega$ B97 are taken from Ref. [2].

| Reactions                                                                                         | $\Delta E_{ref}^a$ | $\omega$ B97X-D | B97-D | B3LYP-D | BLYP-D | $\omega$ B97X | $\omega$ B97 |
|---------------------------------------------------------------------------------------------------|--------------------|-----------------|-------|---------|--------|---------------|--------------|
| H + N <sub>2</sub> O → OH + N <sub>2</sub>                                                        | -65.08             | 4.80            | 13.72 | 3.69    | 12.02  | 3.72          | 3.82         |
| H + FCH <sub>3</sub> → HF + CH <sub>3</sub>                                                       | -26.64             | 2.18            | -1.14 | -0.08   | 0.63   | 3.37          | 4.27         |
| H + F <sub>2</sub> → HF + F                                                                       | -103.91            | -0.70           | 5.35  | 0.20    | 10.08  | 0.50          | 2.21         |
| CH <sub>3</sub> + FCl → CH <sub>3</sub> F + Cl                                                    | -52.74             | -1.02           | 1.79  | -0.03   | 3.75   | -1.85         | -2.60        |
| F <sup>-</sup> + CH <sub>3</sub> Cl → FCH <sub>3</sub> + Cl <sup>-</sup>                          | -32.65             | -2.18           | -1.16 | -2.09   | 0.36   | -1.29         | 0.78         |
| F <sup>-</sup> ···CH <sub>3</sub> Cl → FCH <sub>3</sub> ···Cl <sup>-</sup>                        | -26.73             | -0.80           | 1.80  | 0.41    | 4.03   | -0.23         | 1.17         |
| OH <sup>-</sup> + CH <sub>3</sub> F → HOCH <sub>3</sub> + F <sup>-</sup>                          | -20.11             | -1.25           | 0.82  | -0.31   | 0.73   | -1.22         | -1.80        |
| OH <sup>-</sup> ···CH <sub>3</sub> F → HOCH <sub>3</sub> ···F <sup>-</sup>                        | -36.24             | -2.44           | -0.93 | -1.54   | -0.28  | -1.62         | -1.36        |
| H + N <sub>2</sub> → HN <sub>2</sub>                                                              | 3.97               | -5.06           | -7.59 | -7.41   | -7.27  | -4.30         | -3.57        |
| H + CO → HCO                                                                                      | -19.51             | -3.28           | -5.93 | -5.76   | -5.87  | -2.66         | -1.91        |
| H + C <sub>2</sub> H <sub>4</sub> → CH <sub>3</sub> CH <sub>2</sub>                               | -40.03             | -2.47           | -1.52 | -2.42   | 0.60   | -2.97         | -3.52        |
| CH <sub>3</sub> + C <sub>2</sub> H <sub>4</sub> → CH <sub>3</sub> CH <sub>2</sub> CH <sub>2</sub> | -26.12             | -2.90           | 2.29  | 0.50    | 3.48   | -4.05         | -5.65        |
| HCN → HNC                                                                                         | 15.05              | -1.85           | -0.44 | -0.94   | 0.09   | -1.87         | -1.97        |
| H + HCl → H <sub>2</sub> + Cl                                                                     | -3.0               | 2.71            | -2.38 | -1.49   | -1.28  | 3.09          | 3.18         |
| OH + H <sub>2</sub> → H + H <sub>2</sub> O                                                        | -16.1              | -0.41           | 2.87  | 3.23    | 2.20   | -0.84         | -1.02        |
| CH <sub>3</sub> + H <sub>2</sub> → H + CH <sub>4</sub>                                            | -3.2               | -1.33           | 3.83  | 2.29    | 2.55   | -2.30         | -2.86        |
| OH + CH <sub>4</sub> → CH <sub>3</sub> + H <sub>2</sub> O                                         | -12.9              | 0.92            | -0.96 | 0.95    | -0.36  | 1.46          | 1.84         |
| OH + NH <sub>3</sub> → H <sub>2</sub> O + NH <sub>2</sub>                                         | -9.5               | -0.17           | -1.89 | -0.37   | -1.43  | 0.15          | 0.23         |
| HCl + CH <sub>3</sub> → Cl + CH <sub>4</sub>                                                      | -6.2               | 1.38            | 1.45  | 0.80    | 1.27   | 0.79          | 0.33         |
| OH + C <sub>2</sub> H <sub>6</sub> → H <sub>2</sub> O + C <sub>2</sub> H <sub>5</sub>             | -16.5              | 0.22            | -2.33 | 0.41    | -1.31  | 0.54          | 1.04         |
| F + H <sub>2</sub> → HF + H                                                                       | -31.6              | -1.09           | -0.27 | 1.81    | -0.71  | -1.46         | -1.96        |
| O + CH <sub>4</sub> → OH + CH <sub>3</sub>                                                        | 5.6                | -0.92           | -2.32 | -3.14   | -5.70  | -0.50         | 0.03         |
| H + PH <sub>3</sub> → PH <sub>2</sub> + H <sub>2</sub>                                            | -20.1              | -0.09           | -5.25 | -3.06   | -3.35  | 0.61          | 0.74         |
| H + HO → H <sub>2</sub> + O                                                                       | -2.4               | 2.26            | -1.51 | 0.85    | 3.14   | 2.80          | 2.82         |
| H + H <sub>2</sub> S → H <sub>2</sub> + HS                                                        | -13.8              | 1.60            | -3.73 | -2.12   | -2.17  | 2.17          | 2.32         |
| O + HCl → OH + Cl                                                                                 | -0.6               | 0.46            | -0.87 | -2.34   | -4.43  | 0.29          | 0.36         |
| NH <sub>2</sub> + CH <sub>3</sub> → CH <sub>4</sub> + NH                                          | -14.4              | 1.53            | 2.09  | 3.35    | 4.55   | 1.49          | 1.28         |
| NH <sub>2</sub> + C <sub>2</sub> H <sub>5</sub> → C <sub>2</sub> H <sub>6</sub> + NH              | -10.8              | 2.23            | 3.46  | 3.89    | 5.50   | 2.41          | 2.08         |
| C <sub>2</sub> H <sub>6</sub> + NH <sub>2</sub> → NH <sub>3</sub> + C <sub>2</sub> H <sub>5</sub> | -7.0               | 0.39            | -0.44 | 0.78    | 0.13   | 0.39          | 0.81         |
| NH <sub>2</sub> + CH <sub>4</sub> → CH <sub>3</sub> + NH <sub>3</sub>                             | -3.3               | 0.99            | 0.83  | 1.22    | 0.98   | 1.21          | 1.50         |
| MSE                                                                                               |                    | -0.21           | -0.01 | -0.29   | 0.73   | -0.07         | 0.09         |
| MAE                                                                                               |                    | 1.66            | 2.70  | 1.92    | 3.01   | 1.74          | 1.97         |
| rms                                                                                               |                    | 2.06            | 3.81  | 2.56    | 4.19   | 2.10          | 2.36         |
| Max(-)                                                                                            |                    | -5.06           | -7.59 | -7.41   | -7.27  | -4.30         | -5.65        |
| Max(+)                                                                                            |                    | 4.80            | 13.72 | 3.89    | 12.02  | 3.72          | 4.27         |

TABLE IV: Non-hydrogen transfer barrier heights (in kcal/mol) of the NHTBH38/04 set [5]. The results for the  $\omega$ B97X and  $\omega$ B97 are taken from Ref. [2].

| Reactions                                                                                         |       | $\Delta E_{ref}$ | $\omega$ B97X-D | B97-D  | B3LYP-D | BLYP-D | $\omega$ B97X | $\omega$ B97 |
|---------------------------------------------------------------------------------------------------|-------|------------------|-----------------|--------|---------|--------|---------------|--------------|
| <b>Heavy-atom transfer reactions</b>                                                              |       |                  |                 |        |         |        |               |              |
| H + N <sub>2</sub> O → OH + N <sub>2</sub>                                                        | $V^f$ | 18.14            | 17.45           | 12.93  | 11.05   | 8.18   | 19.22         | 20.67        |
|                                                                                                   | $V^r$ | 83.22            | 77.73           | 64.29  | 72.44   | 61.24  | 80.57         | 81.93        |
| H + FH → HF + H                                                                                   | $V^f$ | 42.18            | 40.54           | 33.86  | 30.77   | 25.76  | 43.10         | 44.78        |
|                                                                                                   | $V^r$ | 42.18            | 40.54           | 33.86  | 30.77   | 25.76  | 43.10         | 44.78        |
| H + ClH → HCl + H                                                                                 | $V^f$ | 18.00            | 18.24           | 13.81  | 12.36   | 9.74   | 20.73         | 23.17        |
|                                                                                                   | $V^r$ | 18.00            | 18.24           | 13.81  | 12.36   | 9.74   | 20.73         | 23.17        |
| H + FCH <sub>3</sub> → HF + CH <sub>3</sub>                                                       | $V^f$ | 30.38            | 30.10           | 20.48  | 21.09   | 15.32  | 32.14         | 33.46        |
|                                                                                                   | $V^r$ | 57.02            | 54.56           | 48.26  | 47.81   | 41.33  | 55.41         | 55.83        |
| H + F <sub>2</sub> → HF + F                                                                       | $V^f$ | 2.27             | -0.64           | -6.26  | -7.65   | -11.79 | 0.86          | 1.96         |
|                                                                                                   | $V^r$ | 106.18           | 103.97          | 92.30  | 96.06   | 82.04  | 104.27        | 103.66       |
| CH <sub>3</sub> + FCl → CH <sub>3</sub> F + Cl                                                    | $V^f$ | 7.43             | 2.84            | -6.56  | -2.85   | -8.42  | 3.93          | 4.62         |
|                                                                                                   | $V^r$ | 60.17            | 56.60           | 44.39  | 49.91   | 40.57  | 58.52         | 59.96        |
| <b>Nucleophilic substitution reactions</b>                                                        |       |                  |                 |        |         |        |               |              |
| F <sup>-</sup> + CH <sub>3</sub> F → FCH <sub>3</sub> + F <sup>-</sup>                            | $V^f$ | -0.34            | -1.36           | -5.99  | -4.85   | -8.95  | -2.27         | -2.60        |
|                                                                                                   | $V^r$ | -0.34            | -1.36           | -5.99  | -4.85   | -8.95  | -2.27         | -2.60        |
| F <sup>-</sup> ···CH <sub>3</sub> F → FCH <sub>3</sub> ···F <sup>-</sup>                          | $V^f$ | 13.38            | 12.91           | 8.56   | 10.51   | 6.82   | 13.28         | 13.32        |
|                                                                                                   | $V^r$ | 13.38            | 12.91           | 8.56   | 10.51   | 6.82   | 13.28         | 13.32        |
| Cl <sup>-</sup> + CH <sub>3</sub> Cl → ClCH <sub>3</sub> + Cl <sup>-</sup>                        | $V^f$ | 3.10             | 3.71            | -4.14  | -2.09   | -5.70  | 4.71          | 6.21         |
|                                                                                                   | $V^r$ | 3.10             | 3.71            | -4.14  | -2.09   | -5.70  | 4.71          | 6.21         |
| Cl <sup>-</sup> ···CH <sub>3</sub> Cl → ClCH <sub>3</sub> ···Cl <sup>-</sup>                      | $V^f$ | 13.61            | 14.37           | 6.99   | 9.15    | 5.64   | 16.09         | 17.74        |
|                                                                                                   | $V^r$ | 13.61            | 14.37           | 6.99   | 9.15    | 5.64   | 16.09         | 17.74        |
| F <sup>-</sup> + CH <sub>3</sub> Cl → FCH <sub>3</sub> + Cl <sup>-</sup>                          | $V^f$ | -12.54           | -13.47          | -19.02 | -17.72  | -20.69 | -13.11        | -11.72       |
|                                                                                                   | $V^r$ | 20.11            | 21.36           | 14.79  | 17.01   | 11.60  | 20.83         | 20.15        |
| F <sup>-</sup> ···CH <sub>3</sub> Cl → FCH <sub>3</sub> ···Cl <sup>-</sup>                        | $V^f$ | 2.89             | 3.16            | -0.93  | 0.40    | -1.56  | 4.23          | 5.39         |
|                                                                                                   | $V^r$ | 29.62            | 30.70           | 24.00  | 26.72   | 21.14  | 31.19         | 30.95        |
| OH <sup>-</sup> + CH <sub>3</sub> F → HOCH <sub>3</sub> + F <sup>-</sup>                          | $V^f$ | -2.78            | -3.32           | -8.75  | -7.40   | -11.57 | -3.70         | -4.05        |
|                                                                                                   | $V^r$ | 17.33            | 18.05           | 10.54  | 13.02   | 7.80   | 17.64         | 17.86        |
| OH <sup>-</sup> ···CH <sub>3</sub> F → HOCH <sub>3</sub> ···F <sup>-</sup>                        | $V^f$ | 10.96            | 10.50           | 4.83   | 7.21    | 3.18   | 11.47         | 11.52        |
|                                                                                                   | $V^r$ | 47.20            | 49.18           | 42.01  | 44.98   | 39.69  | 49.33         | 49.13        |
| <b>Unimolecular and association reactions</b>                                                     |       |                  |                 |        |         |        |               |              |
| H + N <sub>2</sub> → HN <sub>2</sub>                                                              | $V^f$ | 14.69            | 12.32           | 7.59   | 7.32    | 5.08   | 13.99         | 15.47        |
|                                                                                                   | $V^r$ | 10.72            | 13.42           | 11.21  | 10.76   | 8.38   | 14.32         | 15.06        |
| H + CO → HCO                                                                                      | $V^f$ | 3.17             | 3.37            | 0.87   | -0.86   | -2.26  | 4.55          | 5.65         |
|                                                                                                   | $V^r$ | 22.68            | 26.16           | 26.31  | 24.41   | 23.12  | 26.72         | 27.07        |
| H + C <sub>2</sub> H <sub>4</sub> → CH <sub>3</sub> CH <sub>2</sub>                               | $V^f$ | 1.72             | 2.99            | 0.58   | -1.17   | -1.83  | 4.07          | 4.94         |
|                                                                                                   | $V^r$ | 41.75            | 45.49           | 42.13  | 41.28   | 37.60  | 47.07         | 48.49        |
| CH <sub>3</sub> + C <sub>2</sub> H <sub>4</sub> → CH <sub>3</sub> CH <sub>2</sub> CH <sub>2</sub> | $V^f$ | 6.85             | 4.57            | 1.00   | 3.14    | 1.45   | 5.04          | 4.81         |
|                                                                                                   | $V^r$ | 32.97            | 33.59           | 24.84  | 28.75   | 24.10  | 35.21         | 36.59        |
| HCN → HNC                                                                                         | $V^f$ | 48.16            | 46.43           | 46.68  | 47.54   | 46.95  | 46.29         | 45.89        |
|                                                                                                   | $V^r$ | 33.11            | 33.22           | 32.08  | 33.43   | 31.81  | 33.12         | 32.80        |
| MSE                                                                                               |       |                  | -0.42           | -6.22  | -5.13   | -9.32  | 0.56          | 1.32         |
| MAE                                                                                               |       |                  | 1.51            | 6.46   | 5.24    | 9.34   | 1.75          | 2.31         |
| rms                                                                                               |       |                  | 2.00            | 7.58   | 6.17    | 10.82  | 2.08          | 2.82         |
| Max(-)                                                                                            |       |                  | -5.49           | -18.93 | -11.41  | -24.14 | -3.50         | -2.81        |
| Max(+)                                                                                            |       |                  | 3.74            | 3.63   | 1.73    | 0.44   | 5.32          | 6.74         |

TABLE V: Hydrogen transfer barrier heights (in kcal/mol) of the HTBH38/04 set [4, 5]. The results for the  $\omega$ B97X and  $\omega$ B97 are taken from Ref. [2].

| Reactions                                                                                                         | $\Delta E_{ref}$ | $\omega$ B97X-D | B97-D  | B3LYP-D | BLYP-D | $\omega$ B97X | $\omega$ B97 |
|-------------------------------------------------------------------------------------------------------------------|------------------|-----------------|--------|---------|--------|---------------|--------------|
| H + HCl $\rightarrow$ H <sub>2</sub> + Cl                                                                         | $V^f$ 5.7        | 4.22            | -1.58  | -0.89   | -2.60  | 5.33          | 6.68         |
|                                                                                                                   | $V^r$ 8.7        | 4.51            | 3.80   | 3.60    | 1.69   | 5.24          | 6.49         |
| OH + H <sub>2</sub> $\rightarrow$ H + H <sub>2</sub> O                                                            | $V^f$ 5.1        | 2.24            | -1.45  | 0.11    | -3.95  | 2.56          | 3.27         |
|                                                                                                                   | $V^r$ 21.2       | 18.76           | 11.78  | 12.98   | 9.96   | 19.50         | 20.39        |
| CH <sub>3</sub> + H <sub>2</sub> $\rightarrow$ H + CH <sub>4</sub>                                                | $V^f$ 12.1       | 9.14            | 7.82   | 7.69    | 5.96   | 9.63          | 10.29        |
|                                                                                                                   | $V^r$ 15.3       | 13.67           | 7.20   | 8.61    | 6.60   | 15.13         | 16.35        |
| OH + CH <sub>4</sub> $\rightarrow$ CH <sub>3</sub> + H <sub>2</sub> O                                             | $V^f$ 6.7        | 3.19            | -3.11  | 0.81    | -4.02  | 3.97          | 4.53         |
|                                                                                                                   | $V^r$ 19.6       | 15.17           | 10.75  | 12.76   | 9.24   | 15.41         | 15.59        |
| H + H <sub>2</sub> $\rightarrow$ H <sub>2</sub> + H                                                               | $V^f$ 9.6        | 9.22            | 6.47   | 4.05    | 2.67   | 10.74         | 12.38        |
|                                                                                                                   | $V^r$ 9.6        | 9.22            | 6.47   | 4.05    | 2.67   | 10.74         | 12.38        |
| OH + NH <sub>3</sub> $\rightarrow$ H <sub>2</sub> O + NH <sub>2</sub>                                             | $V^f$ 3.2        | 0.01            | -9.03  | -3.73   | -10.47 | 1.62          | 2.83         |
|                                                                                                                   | $V^r$ 12.7       | 9.68            | 2.37   | 6.14    | 0.47   | 10.97         | 12.10        |
| HCl + CH <sub>3</sub> $\rightarrow$ Cl + CH <sub>4</sub>                                                          | $V^f$ 1.7        | -1.67           | -4.75  | -2.95   | -5.06  | -1.07         | -0.47        |
|                                                                                                                   | $V^r$ 7.9        | 3.15            | 0.01   | 2.45    | -0.13  | 4.34          | 5.41         |
| OH + C <sub>2</sub> H <sub>6</sub> $\rightarrow$ H <sub>2</sub> O + C <sub>2</sub> H <sub>5</sub>                 | $V^f$ 3.4        | 0.33            | -6.54  | -2.32   | -7.57  | 1.26          | 1.85         |
|                                                                                                                   | $V^r$ 19.9       | 16.61           | 12.29  | 13.77   | 10.24  | 17.22         | 17.31        |
| F + H <sub>2</sub> $\rightarrow$ HF + H                                                                           | $V^f$ 1.8        | -3.70           | -8.98  | -6.25   | -11.87 | -3.89         | -3.76        |
|                                                                                                                   | $V^r$ 33.4       | 28.98           | 22.89  | 23.54   | 20.45  | 29.17         | 29.80        |
| O + CH <sub>4</sub> $\rightarrow$ OH + CH <sub>3</sub>                                                            | $V^f$ 13.7       | 9.36            | 3.07   | 5.97    | 0.51   | 9.94          | 10.45        |
|                                                                                                                   | $V^r$ 8.1        | 4.69            | -0.21  | 3.51    | 0.61   | 4.85          | 4.82         |
| H + PH <sub>3</sub> $\rightarrow$ PH <sub>2</sub> + H <sub>2</sub>                                                | $V^f$ 3.1        | 3.22            | -0.82  | -1.49   | -3.07  | 4.62          | 5.88         |
|                                                                                                                   | $V^r$ 23.2       | 23.41           | 24.52  | 21.67   | 20.38  | 24.11         | 25.25        |
| H + HO $\rightarrow$ H <sub>2</sub> + O                                                                           | $V^f$ 10.7       | 8.78            | 1.76   | 4.04    | 1.48   | 9.79          | 10.68        |
|                                                                                                                   | $V^r$ 13.1       | 8.92            | 5.67   | 5.58    | 0.74   | 9.38          | 10.26        |
| H + H <sub>2</sub> S $\rightarrow$ H <sub>2</sub> + HS                                                            | $V^f$ 3.5        | 4.07            | 0.12   | -0.88   | -2.54  | 5.54          | 6.94         |
|                                                                                                                   | $V^r$ 17.3       | 16.27           | 17.65  | 15.03   | 13.42  | 17.16         | 18.42        |
| O + HCl $\rightarrow$ OH + Cl                                                                                     | $V^f$ 9.8        | 5.63            | -5.26  | 0.92    | -8.82  | 7.07          | 14.21        |
|                                                                                                                   | $V^r$ 10.4       | 5.77            | -3.79  | 3.86    | -3.79  | 7.38          | 14.45        |
| NH <sub>2</sub> + CH <sub>3</sub> $\rightarrow$ CH <sub>4</sub> + NH                                              | $V^f$ 8.0        | 5.67            | 0.83   | 4.59    | 1.81   | 6.50          | 6.95         |
|                                                                                                                   | $V^r$ 22.4       | 18.54           | 13.14  | 15.64   | 11.66  | 19.42         | 20.07        |
| NH <sub>2</sub> + C <sub>2</sub> H <sub>5</sub> $\rightarrow$ C <sub>2</sub> H <sub>6</sub> + NH                  | $V^f$ 7.5        | 7.38            | 2.91   | 6.10    | 3.54   | 8.48          | 8.82         |
|                                                                                                                   | $V^r$ 18.3       | 15.95           | 10.26  | 13.01   | 8.84   | 16.87         | 17.54        |
| C <sub>2</sub> H <sub>6</sub> + NH <sub>2</sub> $\rightarrow$ NH <sub>3</sub> + C <sub>2</sub> H <sub>5</sub>     | $V^f$ 10.4       | 8.81            | 3.43   | 6.80    | 3.04   | 10.16         | 11.01        |
|                                                                                                                   | $V^r$ 17.4       | 15.42           | 10.88  | 13.02   | 9.91   | 16.77         | 17.21        |
| NH <sub>2</sub> + CH <sub>4</sub> $\rightarrow$ CH <sub>3</sub> + NH <sub>3</sub>                                 | $V^f$ 14.5       | 11.39           | 6.45   | 9.56    | 6.03   | 12.64         | 13.49        |
|                                                                                                                   | $V^r$ 17.8       | 13.70           | 8.93   | 11.64   | 8.35   | 14.72         | 15.29        |
| <i>s-trans cis</i> -C <sub>5</sub> H <sub>8</sub> $\rightarrow$ <i>s-trans cis</i> -C <sub>5</sub> H <sub>8</sub> | $V^f$ 38.4       | 39.06           | 34.63  | 37.81   | 34.72  | 41.44         | 42.84        |
|                                                                                                                   | $V^r$ 38.4       | 39.06           | 34.63  | 37.81   | 34.72  | 41.44         | 42.84        |
| MSE                                                                                                               |                  | -2.52           | -7.33  | -5.39   | -8.89  | -1.51         | -0.34        |
| MAE                                                                                                               |                  | 2.64            | 7.41   | 5.39    | 8.89   | 2.24          | 2.24         |
| rms                                                                                                               |                  | 3.04            | 8.09   | 5.80    | 9.52   | 2.58          | 2.62         |
| Max(-)                                                                                                            |                  | -5.50           | -15.06 | -9.86   | -18.62 | -5.69         | -5.56        |
| Max(+)                                                                                                            |                  | 0.66            | 1.32   | -0.59   | -2.82  | 3.04          | 4.44         |

TABLE VI: Comparison of errors of different functionals for the intermolecular bond lengths (in Å) of the 12 weakly bound complexes on the S22 set [1]. For the hydrogen bonded complexes, the hydrogen bond lengths are computed, while for other complexes, the distances of the centers of mass of the monomers are computed.

| Complex [Symmetry]                                               | Reference | MP2    | $\omega$ B97X-D | B97-D  | B3LYP-D | BLYP-D | $\omega$ B97X | $\omega$ B97 |
|------------------------------------------------------------------|-----------|--------|-----------------|--------|---------|--------|---------------|--------------|
| <b>Hydrogen bonded complexes</b>                                 |           |        |                 |        |         |        |               |              |
| (NH <sub>3</sub> ) <sub>2</sub> [C <sub>2h</sub> ]               | 2.504     | 0.010  | 0.032           | 0.043  | -0.006  | 0.002  | -0.019        | -0.033       |
| (H <sub>2</sub> O) <sub>2</sub> [C <sub>s</sub> ]                | 1.952     | -0.017 | -0.017          | 0.014  | -0.039  | -0.028 | -0.030        | -0.029       |
| Formic acid dimer [C <sub>2h</sub> ]                             | 1.670     | -0.015 | -0.003          | -0.019 | -0.019  | -0.020 | 0.008         | 0.019        |
| Formamide dimer [C <sub>2h</sub> ]                               | 1.841     | -0.011 | 0.005           | 0.003  | -0.015  | -0.014 | 0.015         | 0.020        |
| MSE                                                              |           | -0.008 | 0.005           | 0.010  | -0.020  | -0.015 | -0.006        | -0.006       |
| MAE                                                              |           | 0.013  | 0.014           | 0.020  | 0.020   | 0.016  | 0.018         | 0.025        |
| <b>Dispersion complexes</b>                                      |           |        |                 |        |         |        |               |              |
| (CH <sub>4</sub> ) <sub>2</sub> [D <sub>3d</sub> ]               | 3.718     | -0.113 | -0.198          | 0.042  | -0.267  | -0.200 | -0.231        | -0.362       |
| (C <sub>2</sub> H <sub>4</sub> ) <sub>2</sub> [D <sub>2d</sub> ] | 3.718     | -0.066 | -0.064          | -0.114 | -0.218  | -0.194 | -0.080        | -0.140       |
| Benzene·CH <sub>4</sub> [C <sub>3</sub> ]                        | 3.716     | -0.175 | -0.088          | -0.041 | -0.133  | -0.103 | 0.043         | -0.090       |
| Benzene dimer [C <sub>2h</sub> ]                                 | 3.765     | -0.231 | 0.056           | 0.125  | 0.043   | 0.079  | 0.177         | 0.077        |
| MSE                                                              |           | -0.146 | -0.074          | 0.003  | -0.144  | -0.104 | -0.022        | -0.129       |
| MAE                                                              |           | 0.146  | 0.101           | 0.080  | 0.166   | 0.144  | 0.133         | 0.167        |
| <b>Mixed complexes</b>                                           |           |        |                 |        |         |        |               |              |
| Ethene·ethine [C <sub>2v</sub> ]                                 | 4.422     | -0.102 | -0.050          | -0.092 | -0.140  | -0.124 | -0.073        | -0.102       |
| Benzene·H <sub>2</sub> O [C <sub>s</sub> ]                       | 3.380     | -0.144 | -0.144          | -0.084 | -0.162  | -0.117 | -0.129        | -0.192       |
| Benzene·NH <sub>3</sub> [C <sub>s</sub> ]                        | 3.560     | -0.204 | -0.082          | -0.093 | -0.171  | -0.140 | -0.059        | -0.131       |
| Benzene·HCN [C <sub>s</sub> ]                                    | 3.950     | 0.024  | 0.024           | -0.032 | -0.074  | -0.056 | 0.003         | -0.143       |
| MSE                                                              |           | -0.107 | -0.063          | -0.075 | -0.137  | -0.109 | -0.065        | -0.142       |
| MAE                                                              |           | 0.119  | 0.075           | 0.075  | 0.137   | 0.109  | 0.066         | 0.142        |
| MSE                                                              |           | -0.087 | -0.044          | -0.021 | -0.100  | -0.076 | -0.031        | -0.092       |
| MAE                                                              |           | 0.093  | 0.064           | 0.058  | 0.107   | 0.090  | 0.072         | 0.111        |
| rms                                                              |           | 0.121  | 0.085           | 0.071  | 0.136   | 0.111  | 0.100         | 0.145        |
| Max(-)                                                           |           | -0.231 | -0.198          | -0.114 | -0.267  | -0.200 | -0.231        | -0.362       |
| Max(+)                                                           |           | 0.024  | 0.056           | 0.125  | 0.043   | 0.079  | 0.177         | 0.077        |
